# Supplementary material for: The evolution of nuclear auxin signalling
Source: PubMed Central journal article supplement (PMC2708152; doi:10.1186/1471-2148-9-126), 2009-06-03
Supplement: 1471-2148-9-126-S1.pdf [file 1471-2148-9-126-S1.pdf]

*Phypa\_164608/86-101* - ESATALQLGPPAGLKP  
*Phypa\_219923/95-110* - ESATTLQLGPPAAVKP  
*BAB71765.1/84-99* - ESATTLQLGPPAAVKP  
*IAA10/39-55* SVSETELRLALGLSIGR  
*IAA3/7-22* - LKETELRLGLPGTDNV  
*IAA17/9-23* - LRETELRLGLPGGDT-  
*IAA12/15-29* - PAESELRLGLGLSLG-  
*IAA34/19-34* - QKDHKLILSWKKPTMD  
*IAA5/10-25* - LEITELRLGLPGDIVV  
*IAA18/39-54* - EKKLELRLGLPGGEEDD  
*IAA6/8-23* - LEITELRLGLPGDNYN  
*IAA15/16-31* - LGGTELRLALPGTPTN  
*IAA32/25-39* - KGGGVIDLGLSLRTI-  
*IAA8/49-64* - FKATELRLGLPESQSP  
*IAA13/9-24* - KGESELRLGLGLSLGG  
*IAA20/28-44* RNLSTDRLRLGLSFGTSS  
*IAA16/4-19* - FEATELRLGLPGGNHG  
*IAA19/8-23* - LEITELRLGLPGRDVA  
*IAA26/35-50* - EKKLELRLGLPPGGDEE  
*IAA31/24-35* - ESSVNLSSLTFL- - -  
*IAA2/11-26* - LKDTELRLGLPGRTEK  
*IAA7/8-22* - LKATELRLGLPGGAE-  
*IAA30/29-45* RNLSTDRLRLGLSFGSSS  
*IAA14/3-17* - LKETELRLGLPGGTE-  
*IAA1/9-23* - LKDTELRLGLPGAQE-  
*IAA11/29-44* - PIGNELRLGLTSLGR  
*IAA27/40-55* - FKATELRLGLPGSESP  
*IAA29/2-13* - - - - ELDLGLSLSPHK  
*IAA28/4-19* - EKRELELRLAPPCHQFT  
*IAA4/13-28* - LKATELRLGLPGTEET  
*IAA33/2-1* - - - - - - - - - - -  
*IAA9/63-78* - LKATELRLGLPGSQSP  
*Selmo\_1\_2\_26861/4-19* - LGATELRLGLPKSKKP  
*Selmo\_1\_412634/47-62* - MRRETELRLGLPGSPQE  
*Selmo\_1\_406764/106-122* MVEDPDLRLGLGLGPAP

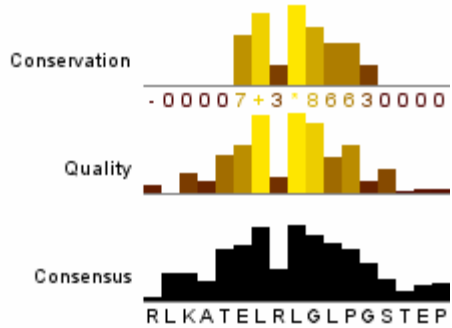

File 1. Amino acid sequence alignment of Aux/IAA proteins of *A. thaliana*, *S. moellendorffii* and *P. patens* across conserved domain I.
