# Supplementary material for: The evolution of nuclear auxin signalling
Source: PubMed Central journal article supplement (PMC2708152; doi:10.1186/1471-2148-9-126), 2009-06-03
Supplement: 1471-2148-9-126-S3.pdf [file 1471-2148-9-126-S3.pdf]

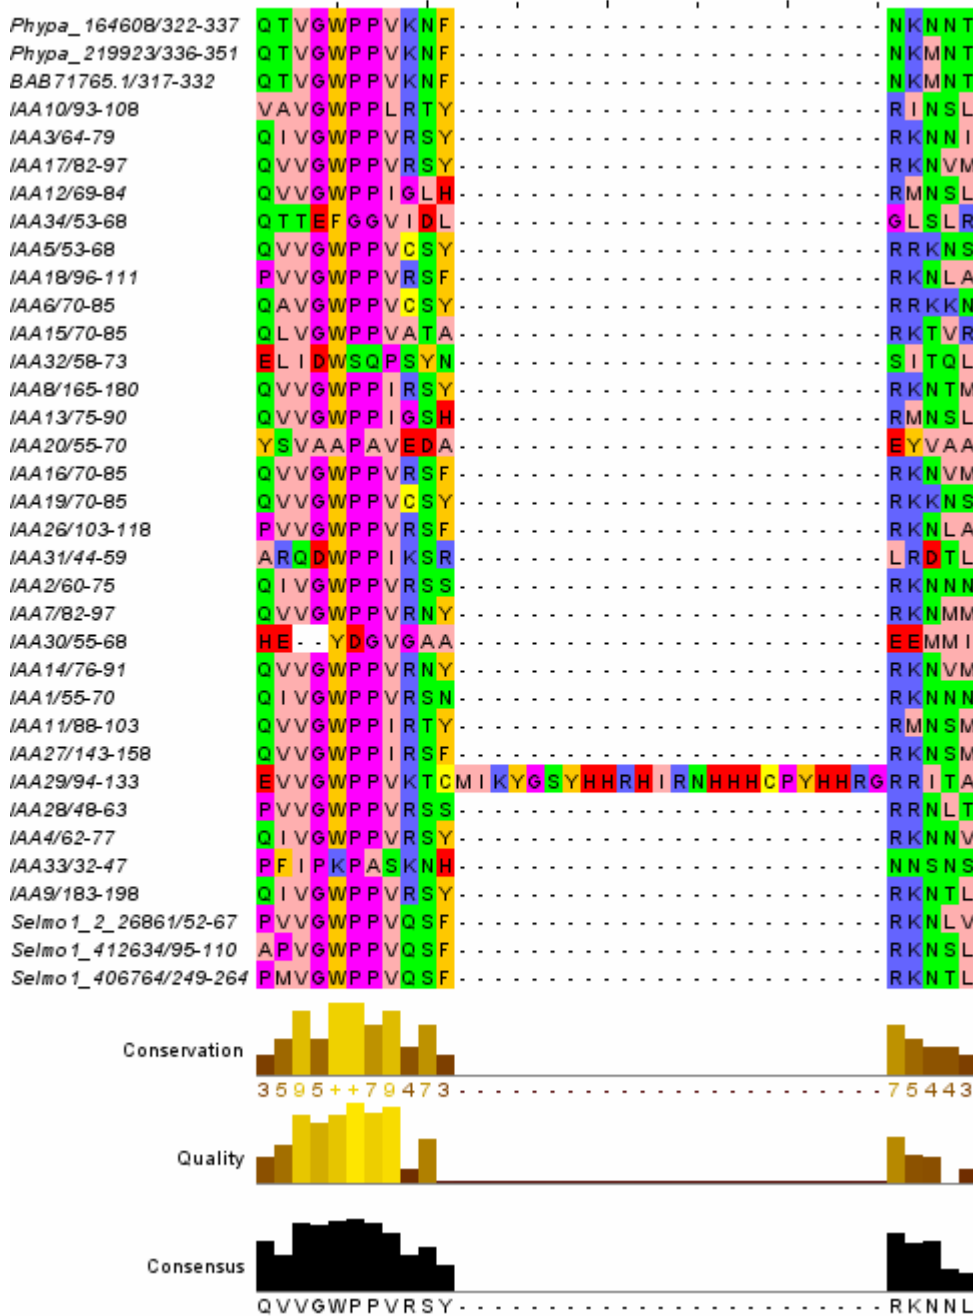

File 3. Amino acid sequence alignment of Aux/IAA proteins of *A. thaliana*, *S. moellendorffii* and *P. patens* domain II.
