# Supplementary material for: The evolution of nuclear auxin signalling
Source: PubMed Central journal article supplement (PMC2708152; doi:10.1186/1471-2148-9-126), 2009-06-03
Supplement: 1471-2148-9-126-S4.pdf [file 1471-2148-9-126-S4.pdf]

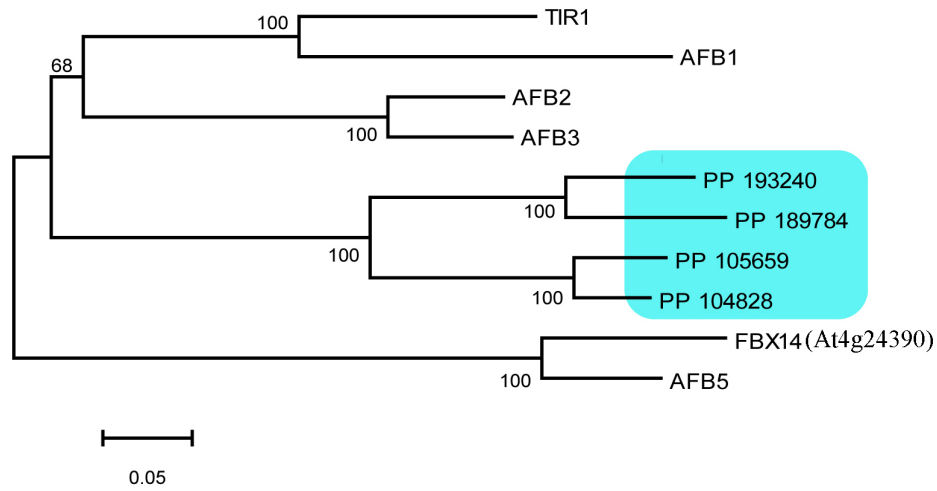

File 4. Phylogenetic relationship of *A. thaliana* and *P. patens* TIR1-like F-box proteins (Neighbor Joining (NJ) method).
