# Supplementary material for: The evolution of nuclear auxin signalling
Source: PubMed Central journal article supplement (PMC2708152; doi:10.1186/1471-2148-9-126), 2009-06-03
Supplement: 1471-2148-9-126-S5.pdf [file 1471-2148-9-126-S5.pdf]

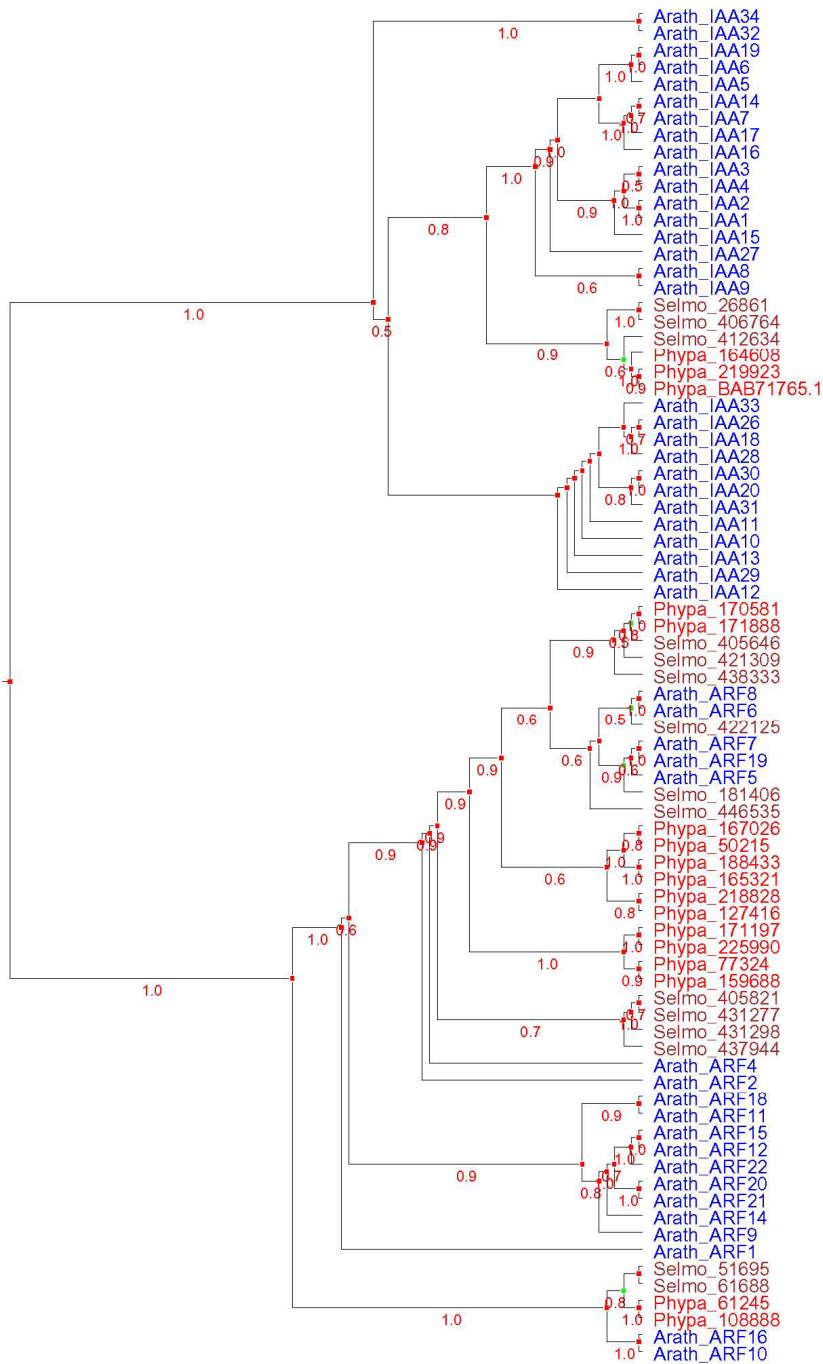

File 5. Phylogenetic relationship of *A. thaliana*, *S. moellendorffii* and *P. patens* ARF and Aux/IAA proteins (Bayesian inference) was reconciled with Notung using the species tree (Phypa, (Selmo, Arath)).
