# Supplementary material for: The evolution of nuclear auxin signalling
Source: PubMed Central journal article supplement (PMC2708152; doi:10.1186/1471-2148-9-126), 2009-06-03
Supplement: 1471-2148-9-126-S6.pdf [file 1471-2148-9-126-S6.pdf]

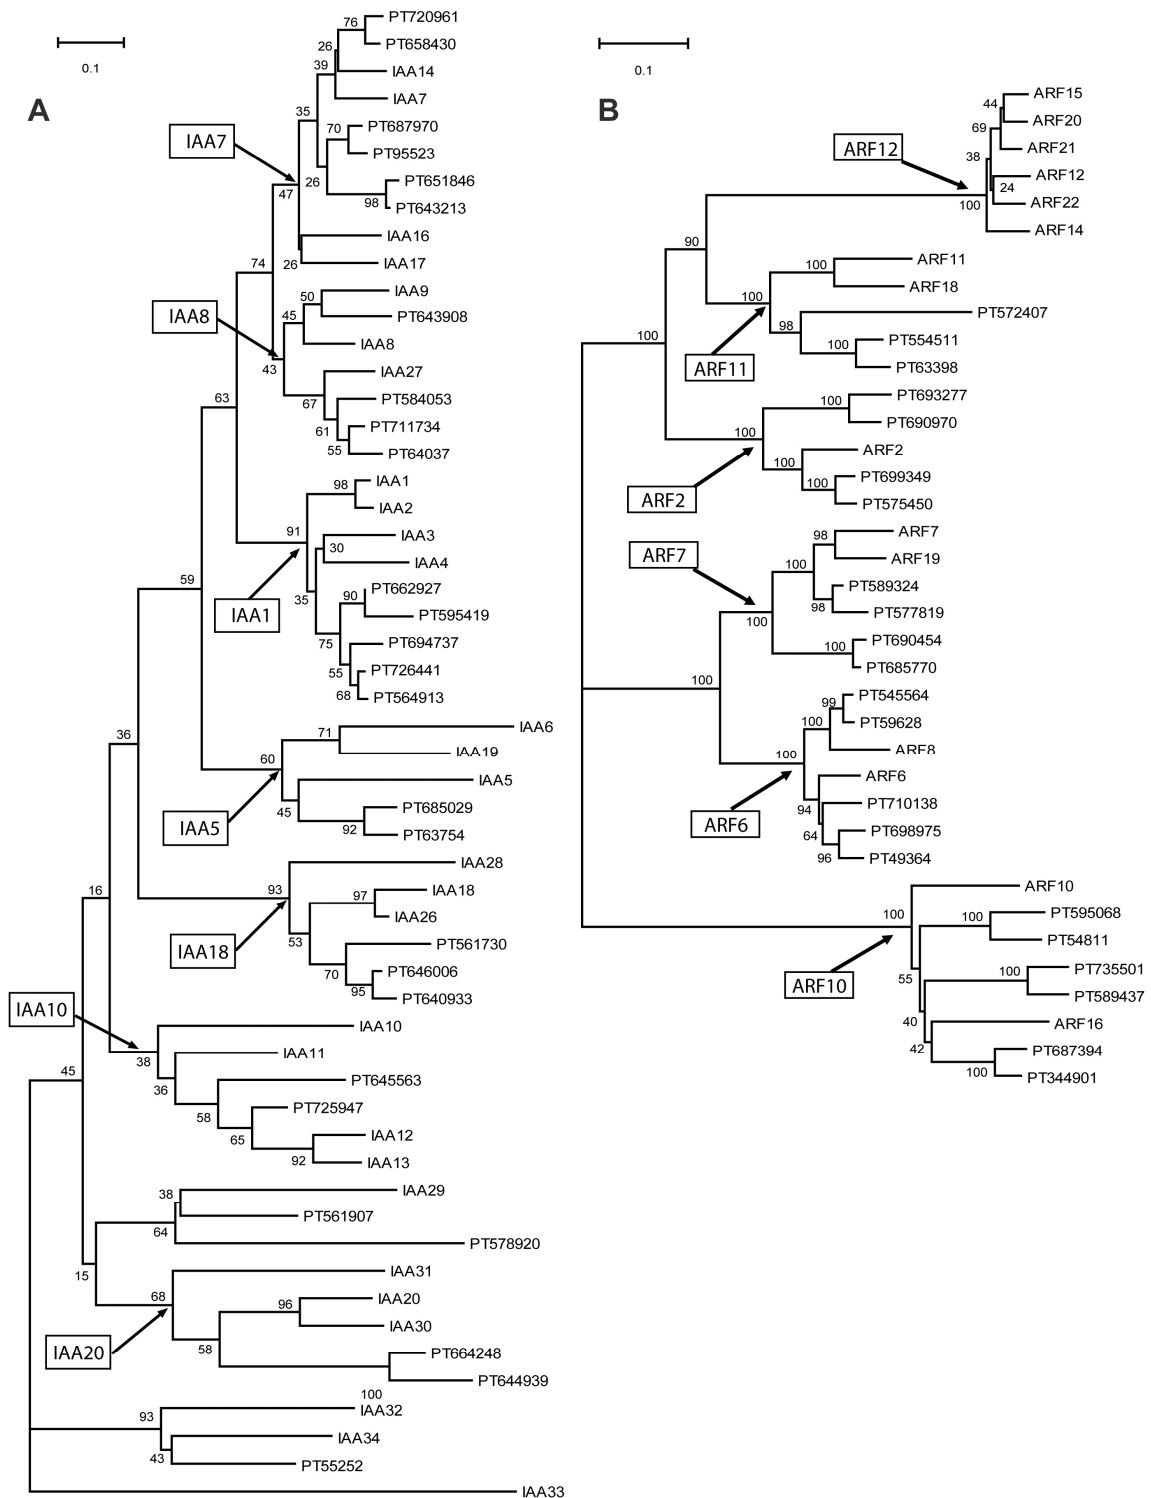

File 6. Phylogeny of *A. thaliana* and *P. trichocarpa* Aux/IAA (A) and ARF (B) proteins. Boxes identify nodes tested for positive selection.
