# Supplementary material for: The evolution of nuclear auxin signalling
Source: PubMed Central journal article supplement (PMC2708152; doi:10.1186/1471-2148-9-126), 2009-06-03
Supplement: 1471-2148-9-126-S7.pdf [file 1471-2148-9-126-S7.pdf]

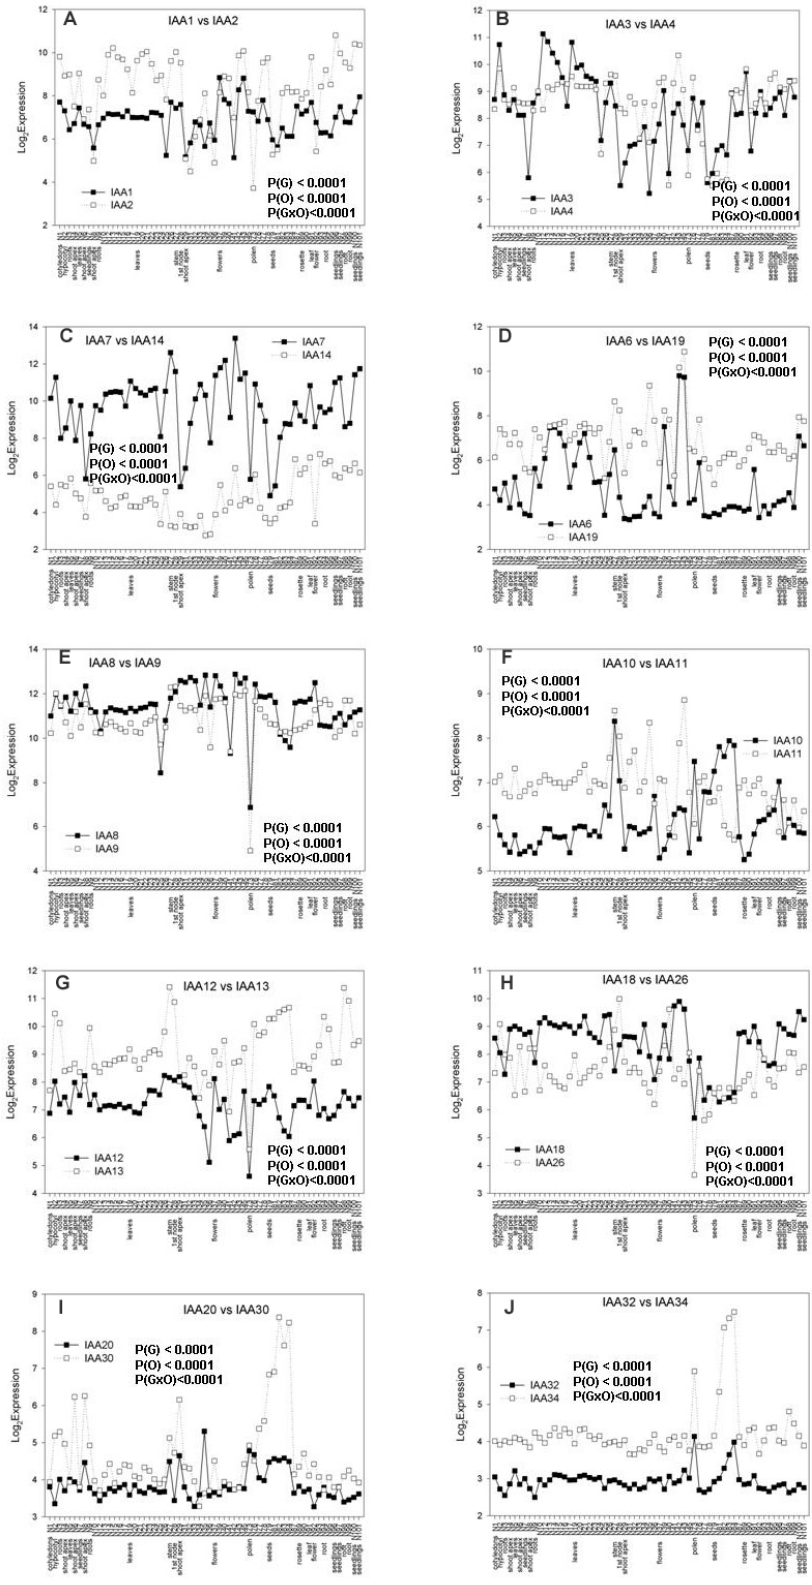

File 7. Expression pattern of paralogous pairs of *A. thaliana* Aux/IAA genes (A-J).
