# Supplementary material for: The evolution of nuclear auxin signalling
Source: PubMed Central journal article supplement (PMC2708152; doi:10.1186/1471-2148-9-126), 2009-06-03
Supplement: 1471-2148-9-126-S8.pdf [file 1471-2148-9-126-S8.pdf]

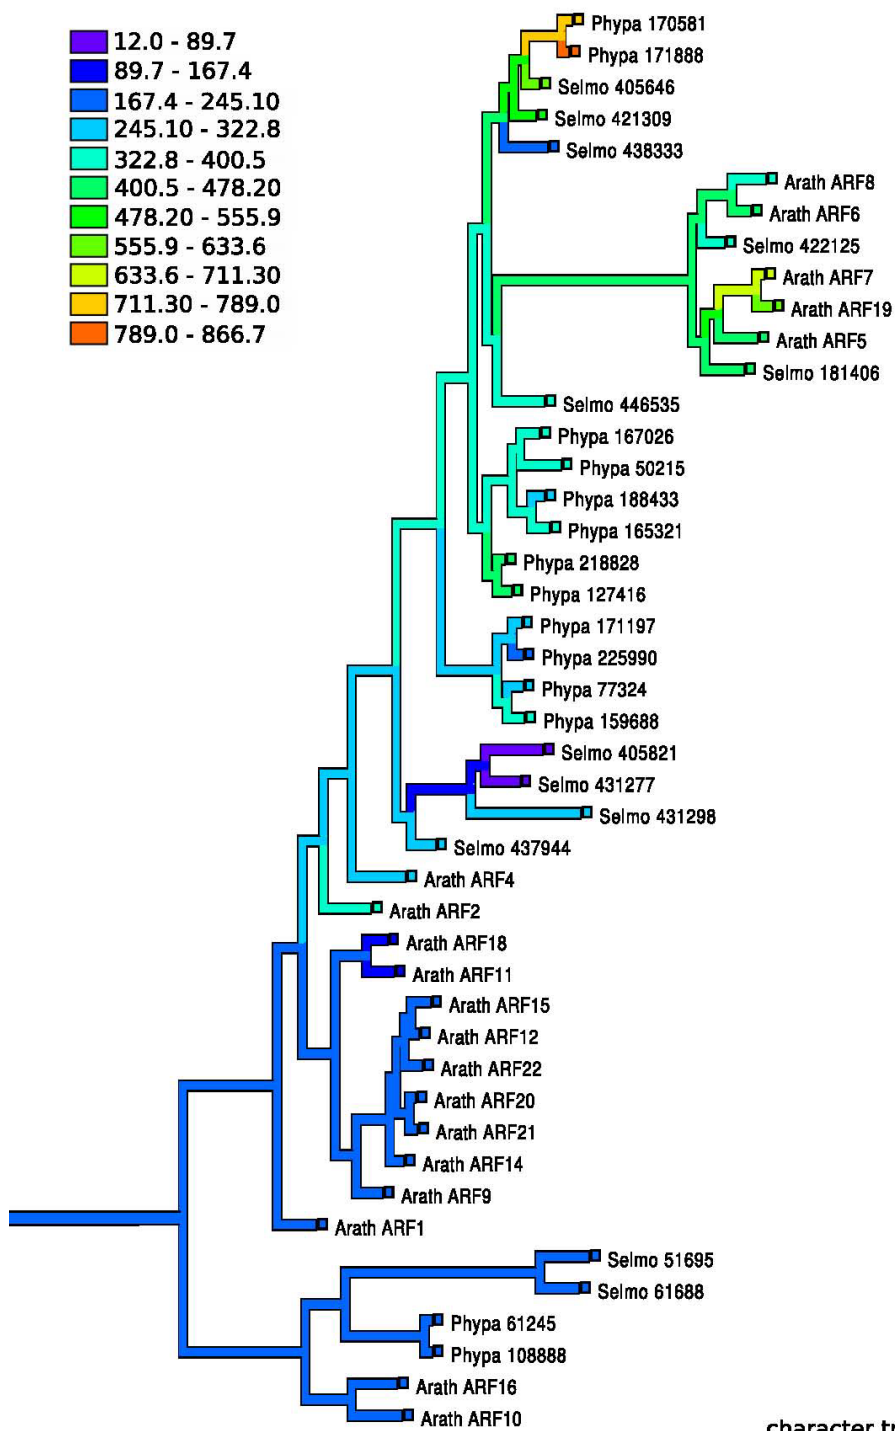

character trace:  
length of the middle region

File 8. Phylogenetic relationship of *A. thaliana*, *S. moellendorffii* and *P. patens* ARF proteins (reconciled tree based on Bayesian inference). Length of middle region was normalized and transformed into a continuous character matrix.
