# Supplementary material for: The evolution of nuclear auxin signalling
Source: PubMed Central journal article supplement (PMC2708152; doi:10.1186/1471-2148-9-126), 2009-06-03
Supplement: 1471-2148-9-126-S9.pdf [file 1471-2148-9-126-S9.pdf]

| Table S1. Detailed comparison of <i>A.thaliana</i> , <i>P.patens</i> and <i>S.moellendorffii</i> ARFs |       |      |        |     |    |                |      |      |      |      |     |        |              |  |  |  |
|-------------------------------------------------------------------------------------------------------|-------|------|--------|-----|----|----------------|------|------|------|------|-----|--------|--------------|--|--|--|
| Proteins                                                                                              | MR    |      | length | III | IV | % by frequency |      |      |      |      |     | length | ScanProsite  |  |  |  |
|                                                                                                       | start | end  |        |     |    | Q              | S    | G    | P    | L    | M   |        |              |  |  |  |
| ARF1                                                                                                  | 355   | 543  | 189    | +   | +  | 5.8            | 16.4 | 7.9  | 12.7 | 3.7  | 0.0 | 665    | P-rich       |  |  |  |
| ARF2                                                                                                  | 395   | 734  | 340    | +   | +  | 5.9            | 12.7 | 5.9  | 8.2  | 6.8  | 2.4 | 859    |              |  |  |  |
| ARF3                                                                                                  | 390   | 566  | 177    | -   | -  | 5.1            | 14.1 | 13   | 6.2  | 5.7  | 0.0 | 608    |              |  |  |  |
| ARF4                                                                                                  | 407   | 666  | 260    | +   | +  | 5.4            | 11.9 | 8.5  | 10   | 6.9  | 2.3 | 788    |              |  |  |  |
| ARF5                                                                                                  | 392   | 798  | 407    | +   | +  | 10.1           | 15.1 | 5.4  | 6.7  | 7.9  | 4.4 | 902    | M-rich       |  |  |  |
| ARF6                                                                                                  | 359   | 795  | 437    | +   | +  | 17.2           | 16   | 6.6  | 7.8  | 10.1 | 4.1 | 933    | Q-rich       |  |  |  |
| ARF7                                                                                                  | 359   | 1039 | 681    | +   | +  | 22.8           | 12.3 | 6.5  | 7.5  | 11   | 2.4 | 1165   | Q-/S-rich    |  |  |  |
| ARF8                                                                                                  | 358   | 706  | 349    | +   | +  | 14.3           | 11.5 | 8.6  | 8    | 11.8 | 3.7 | 811    | Q-rich       |  |  |  |
| ARF9                                                                                                  | 344   | 524  | 181    | +   | +  | 6.1            | 17.7 | 1.7  | 7.2  | 5    | 2.8 | 638    |              |  |  |  |
| ARF10                                                                                                 | 383   | 581  | 199    | +   | +  | 6              | 11.1 | 8    | 7.5  | 8.5  | 3.0 | 693    |              |  |  |  |
| ARF11                                                                                                 | 352   | 491  | 140    | +   | +  | 7.9            | 22.9 | 2.1  | 8.6  | 5.7  | 0.0 | 601    |              |  |  |  |
| ARF12                                                                                                 | 354   | 512  | 159    | +   | +  | 5              | 10.7 | 4.4  | 8.2  | 10.7 | 4.4 | 593    |              |  |  |  |
| ARF13                                                                                                 | 354   | 463  | 110    | -   | -  | 5.6            | 13.9 | 3.7  | 5.6  | 13.9 | 1.9 | 505    |              |  |  |  |
| ARF14                                                                                                 | 354   | 511  | 158    | +   | +  | 7              | 13.9 | 3.8  | 7    | 8.9  | 3.2 | 605    |              |  |  |  |
| ARF15                                                                                                 | 359   | 517  | 159    | +   | +  | 6.9            | 12   | 5    | 8.2  | 10.1 | 3.8 | 598    |              |  |  |  |
| ARF16                                                                                                 | 385   | 585  | 201    | +   | +  | 3.5            | 14.9 | 7.5  | 11.5 | 10   | 1.0 | 670    |              |  |  |  |
| ARF17                                                                                                 | 379   | 506  | 128    | -   | -  | 4.9            | 12.3 | 11.5 | 14.8 | 8.2  | 3.3 | 585    |              |  |  |  |
| ARF18                                                                                                 | 356   | 490  | 135    | +   | +  | 8.9            | 16.3 | 3    | 15.6 | 5.9  | 1.5 | 602    |              |  |  |  |
| ARF19                                                                                                 | 357   | 959  | 603    | +   | +  | 18.9           | 12.9 | 5.6  | 8.1  | 7.3  | 4.2 | 1086   | Q-rich       |  |  |  |
| ARF20                                                                                                 | 352   | 496  | 145    | +   | +  | 6.2            | 10.3 | 4.8  | 6.2  | 10.3 | 4.1 | 590    |              |  |  |  |
| ARF21                                                                                                 | 354   | 512  | 159    | +   | +  | 6.9            | 12   | 4.4  | 8.2  | 10.7 | 3.8 | 606    |              |  |  |  |
| ARF22                                                                                                 | 352   | 510  | 159    | +   | +  | 6.3            | 12   | 5    | 8.2  | 10.7 | 3.8 | 598    |              |  |  |  |
| ARF23                                                                                                 |       |      |        | -   | -  |                |      |      |      |      |     | 222    |              |  |  |  |
| all_Phypa_167026                                                                                      | 537   | 890  | 354    | +   | +  | 9.6            | 11.3 | 7.3  | 9    | 11.6 | 5.1 | 1019   |              |  |  |  |
| all_Phypa_218828                                                                                      | 263   | 648  | 386    | +   | +  | 7.8            | 15.3 | 7.3  | 8    | 7    | 5.3 | 782    |              |  |  |  |
| all_Phypa_165321                                                                                      | 362   | 727  | 366    | +   | +  | 8.2            | 12.8 | 9    | 11.8 | 9    | 3.8 | 849    |              |  |  |  |
| all_Phypa_188433                                                                                      | 373   | 664  | 292    | +   | +  | 8.2            | 13   | 7.9  | 10.6 | 8.2  | 2.7 | 786    |              |  |  |  |
| all_Phypa_159688                                                                                      | 498   | 835  | 338    | +   | +  | 4.4            | 15.1 | 5.6  | 11.2 | 8.6  | 0.9 | 945    |              |  |  |  |
| all_Phypa_77324                                                                                       | 651   | 949  | 299    | +   | +  | 4.7            | 15.1 | 5    | 11.2 | 9.5  | 0.8 | 1059   |              |  |  |  |
| all_Phypa_225990                                                                                      | 338   | 539  | 202    | +   | +  | 4.5            | 14.4 | 6.4  | 12.4 | 8.4  | 1.0 | 642    |              |  |  |  |
| all_Phypa_171197                                                                                      | 742   | 1026 | 285    | +   | +  | 4.9            | 11.9 | 4.9  | 11.6 | 9.5  | 2.1 | 1129   |              |  |  |  |
| all_Phypa_196920                                                                                      | 424   | 639  | 216    | -   | -  | 7.4            | 12.5 | 6.5  | 10.7 | 9.7  | 1.4 | 715    |              |  |  |  |
| Phypa_50215                                                                                           | 342   | 672  | 331    | +   | +  | 10             | 15.4 | 7    | 8.8  | 10.9 | 4.2 | 758    |              |  |  |  |
| Phypa_127416                                                                                          | 348   | 742  | 395    | +   | +  | 8.9            | 15.2 | 8.6  | 8.9  | 7.1  | 4.6 | 876    |              |  |  |  |
| Phypa_108888                                                                                          | 362   | 520  | 159    | +   | +  | 5.7            | 11.3 | 12   | 12   | 10.1 | 3.9 | 596    |              |  |  |  |
| Phypa_170581                                                                                          | 70    | 717  | 648    | +   | +  | 14.5           | 13   | 9.3  | 7.7  | 7.7  | 3.9 | 825    | Q-rich       |  |  |  |
| all_Phypa_171888                                                                                      | 180   | 788  | 609    | +   | +  | 14             | 12.3 | 9.4  | 9    | 7.7  | 4.8 | 896    | Q-/P-rich    |  |  |  |
| Selmo1_2_181406                                                                                       | 351   | 773  | 423    | +   | +  | 28.6           | 9.9  | 3.3  | 6.9  | 9.2  | 2.6 | 908    | Q-rich       |  |  |  |
| Selmo1_2_437944                                                                                       | 371   | 665  | 295    | +   | +  | 5.8            | 11.9 | 6.1  | 8.5  | 6.4  | 3.7 | 796    |              |  |  |  |
| Selmo1_2_61688                                                                                        | 367   | 548  | 182    | +   | +  | 5              | 12.6 | 8.8  | 7.1  | 10.4 | 3.9 | 622    | Q-rich       |  |  |  |
| Selmo1_446535                                                                                         | 353   | 663  | 311    | +   | +  | 11.9           | 10   | 5.1  | 13.8 | 8.7  | 4.2 | 825    | Q-rich       |  |  |  |
| Selmo1_422125                                                                                         | 347   | 684  | 338    | +   | +  | 14.8           | 13.3 | 6.8  | 5.6  | 8.6  | 1.8 | 801    |              |  |  |  |
| Selmo1_2_81992                                                                                        | 343   | 362  | 20     | -   | -  |                |      |      |      |      |     | 382    |              |  |  |  |
| Selmo1_2_51695                                                                                        | 389   | 589  | 201    | +   | +  | 8              | 11.4 | 11.4 | 6    | 9.5  | 1.0 | 665    |              |  |  |  |
| Selmo1_421309                                                                                         | 28    | 486  | 459    | +   | +  | 16.1           | 14.6 | 4.6  | 10.5 | 7.4  | 3.5 | 582    | Q-/P-/H-rich |  |  |  |
| Selmo1_405646                                                                                         | 19    | 560  | 542    | +   | +  | 9.8            | 13.7 | 10.9 | 7.6  | 7.2  | 3.5 | 643    | Q-/G-/H-rich |  |  |  |
