# Supplementary material for: The evolution of nuclear auxin signalling
Source: PubMed Central journal article supplement (PMC2708152; doi:10.1186/1471-2148-9-126), 2009-06-03
Supplement: 1471-2148-9-126-S10.pdf [file 1471-2148-9-126-S10.pdf]

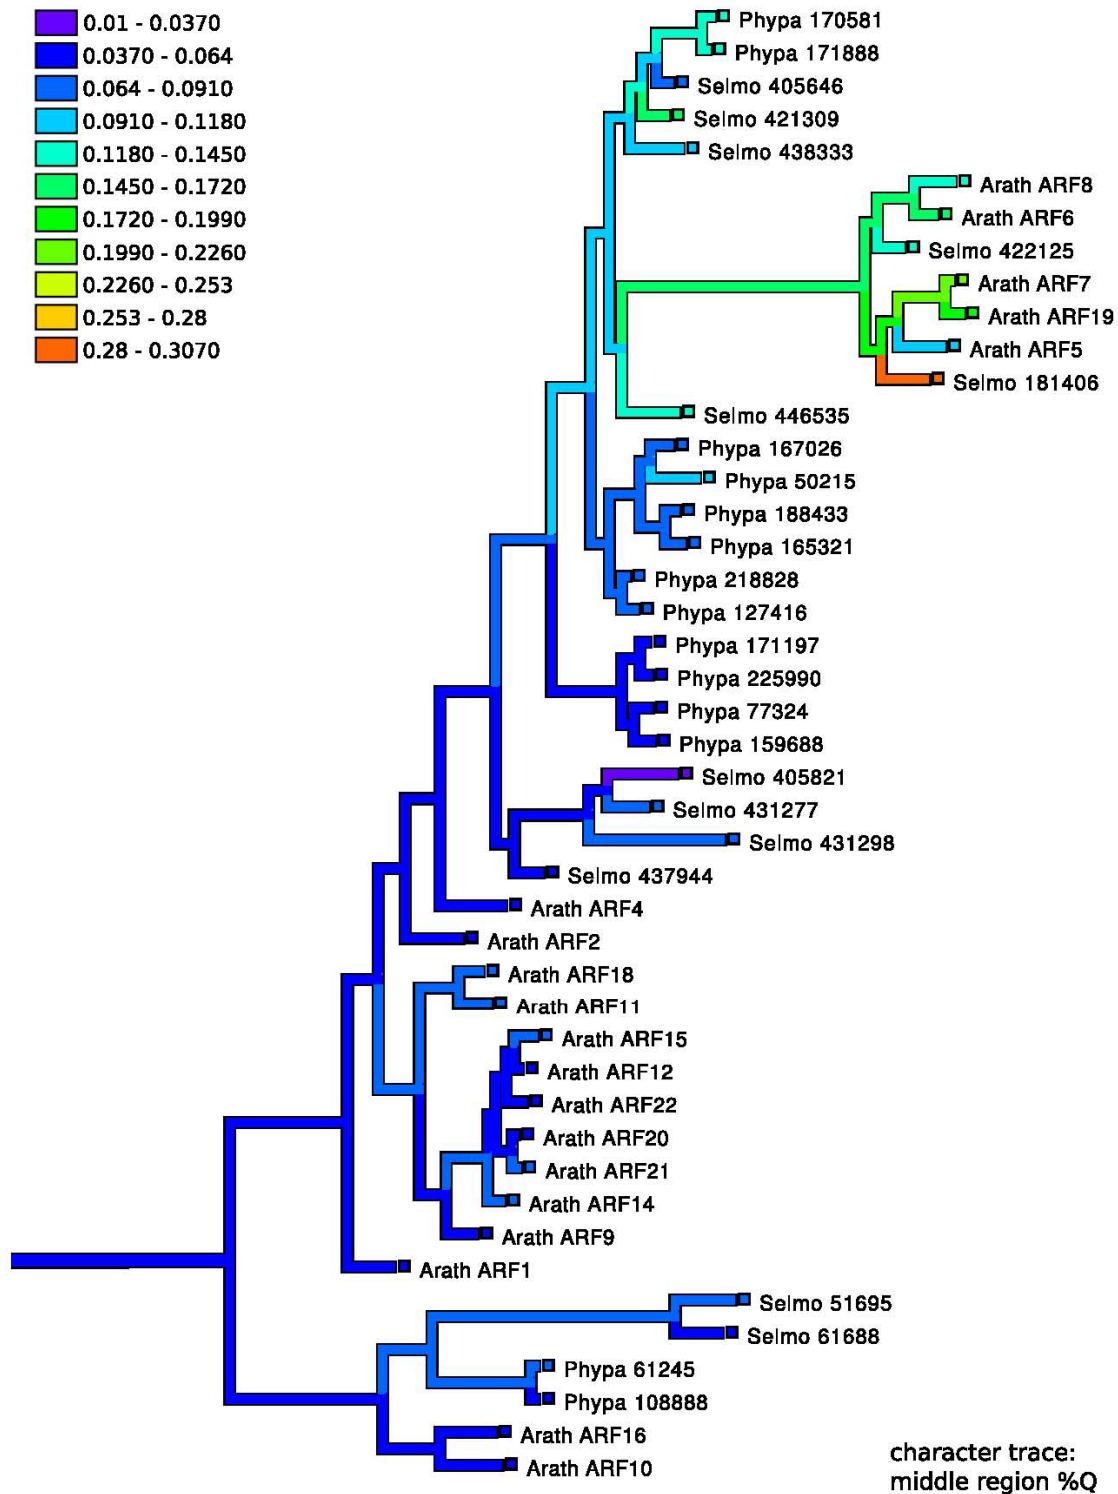

File 9. Phylogenetic relationship of *Arabidopsis*, *Selaginella* and *Physcomitrella* ARF proteins (reconciled tree based on Bayesian inference). Q-rich regions are represented by the amino acid frequency normalized with the length of the MR.
