# Supplementary material for: The evolution of nuclear auxin signalling
Source: PubMed Central journal article supplement (PMC2708152; doi:10.1186/1471-2148-9-126), 2009-06-03
Supplement: 1471-2148-9-126-S11.pdf [file 1471-2148-9-126-S11.pdf]

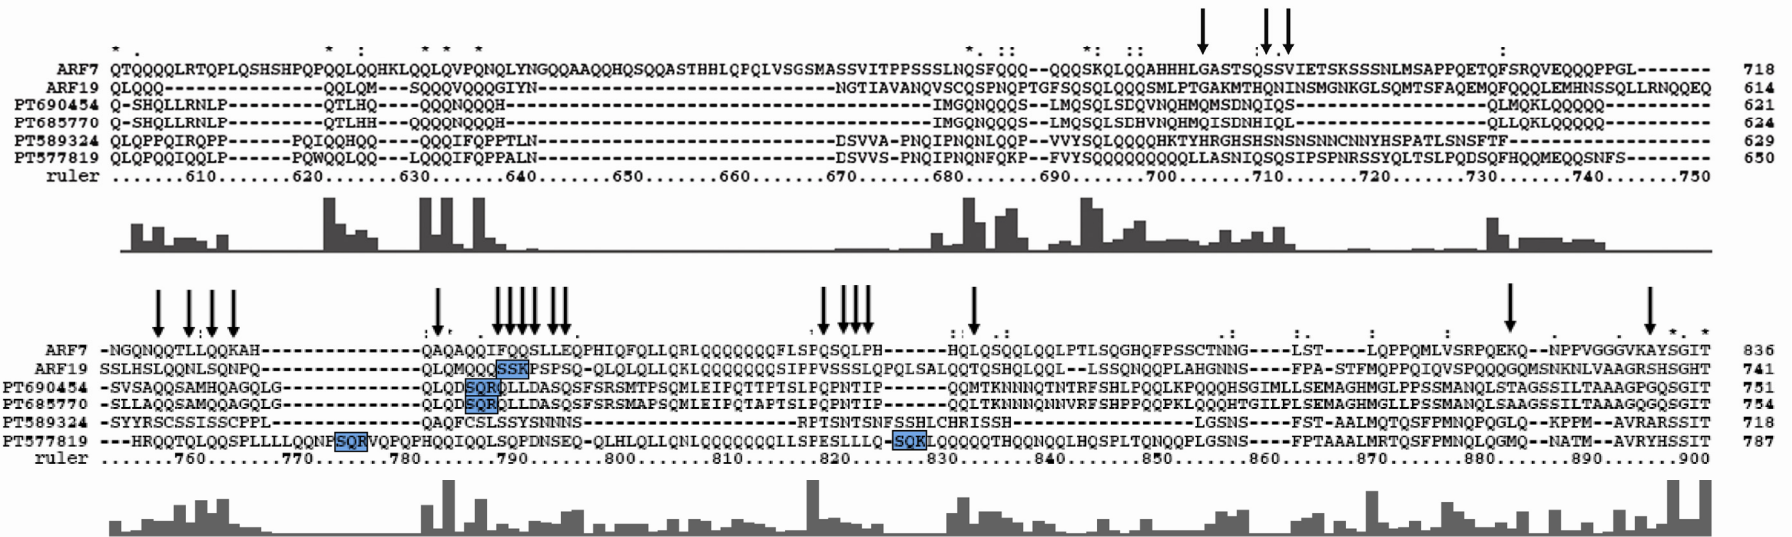

File 10. ARF protein sequence alignment of the middle regions in the ARF7 node of *A. thaliana* and *P. trichocarpa*. Arrows indicate sites at which positive selection was detected. Boxed amino acids indicate putative phosphorylation motifs.
