# Supplementary material for: The evolution of nuclear auxin signalling
Source: PubMed Central journal article supplement (PMC2708152; doi:10.1186/1471-2148-9-126), 2009-06-03
Supplement: 1471-2148-9-126-S12.pdf [file 1471-2148-9-126-S12.pdf]

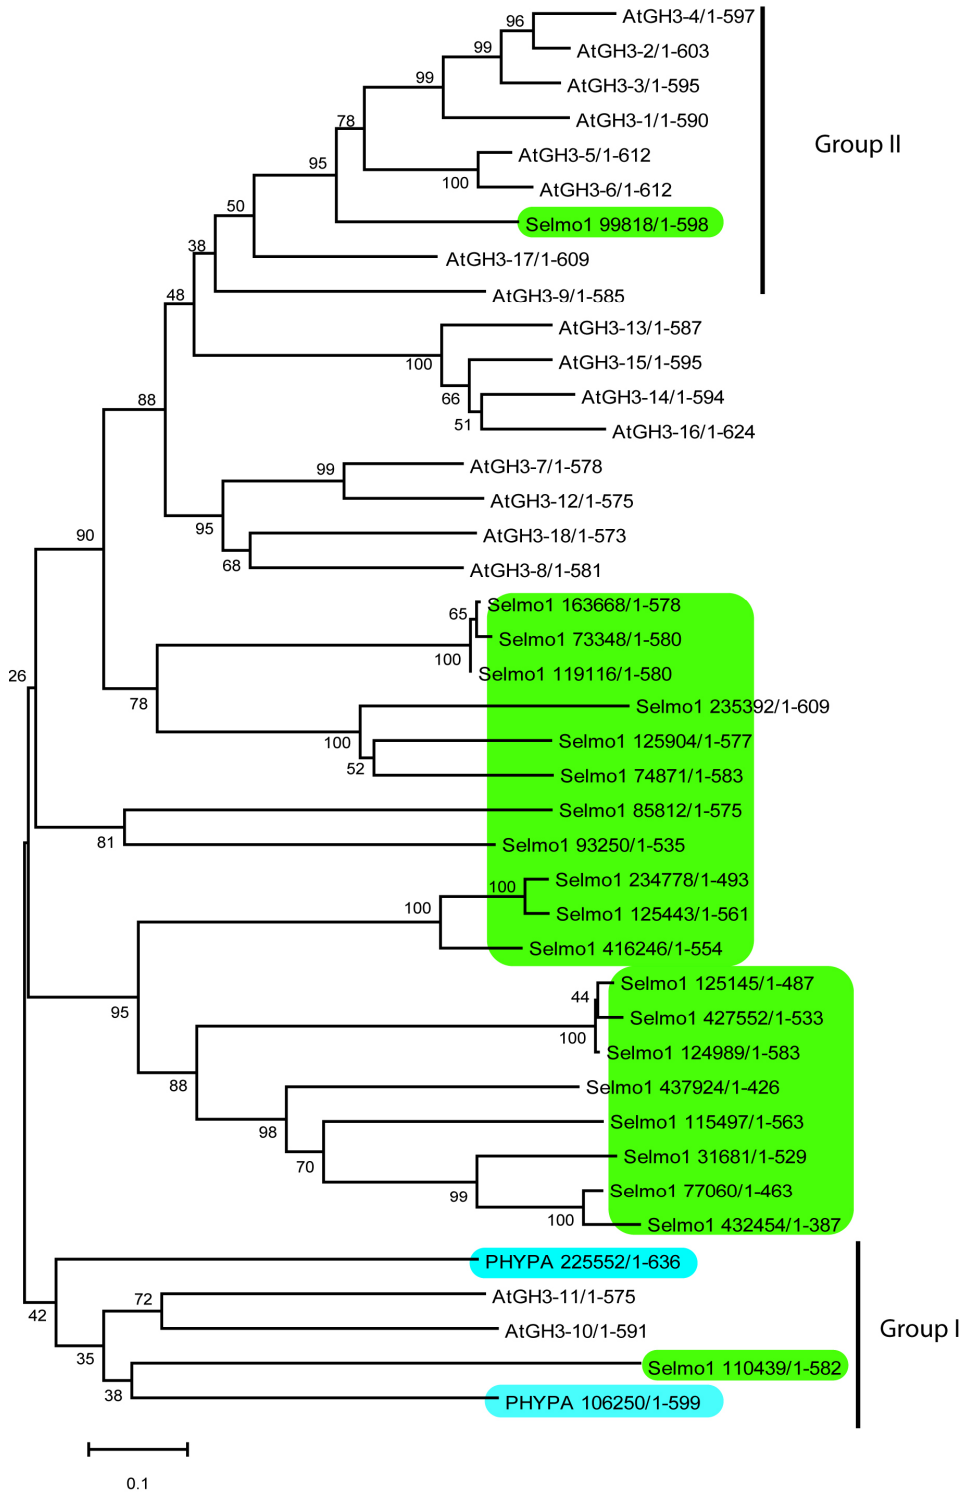

File 11. Phylogenetic relationship (neighbor-joining (NJ) method) of *A. thaliana*, *S. moellendorffii* and *P. patens* GH3 proteins.
