# Supplementary material for: The evolution of nuclear auxin signalling
Source: PubMed Central journal article supplement (PMC2708152; doi:10.1186/1471-2148-9-126), 2009-06-03
Supplement: 1471-2148-9-126-S13.pdf [file 1471-2148-9-126-S13.pdf]

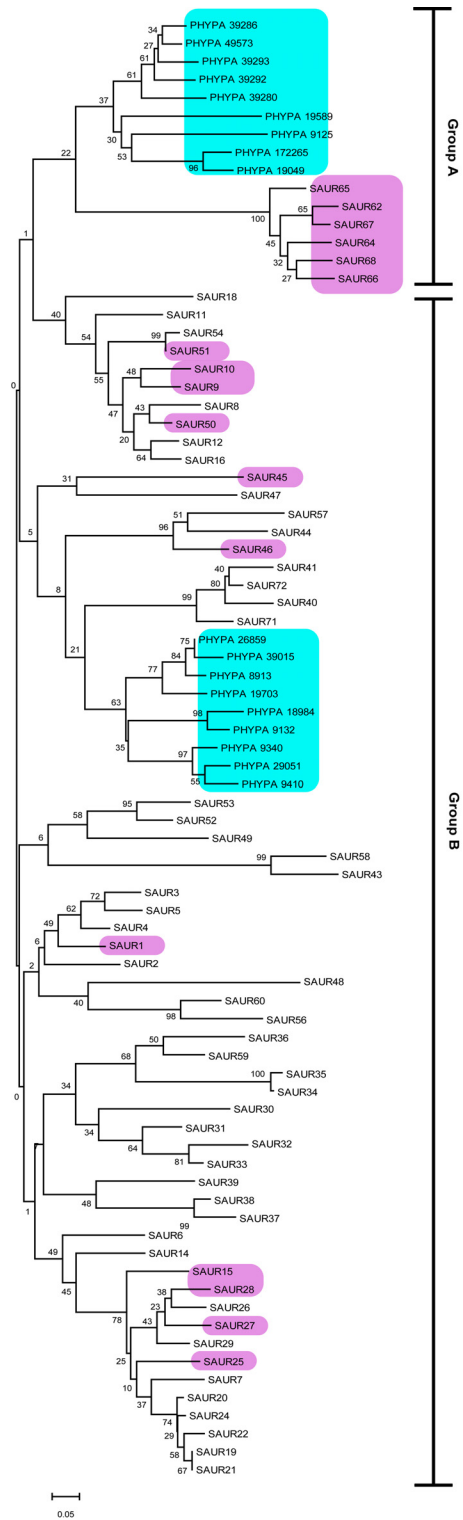

File 12. Phylogenetic relationship (neighbor-joining (NJ) method) of *A. thaliana* and *P. patens* SAUR proteins (light blue). Arabidopsis SAURs transcriptionally up-regulated by auxin are indicated in purple.
